# Supplementary material
Source: ML conference proceedings conference paper supplement (https://proceedings.neurips.cc/paper_files/paper/2015/hash/8f19793b2671094e63a15ab883d50137-Abstract.html)
Supplement: Supplementary file [file 8f19793b2671094e63a15ab883d50137-Supplemental.zip]

## A Proof of Proposition 1

The proof of Proposition 1 follows from results in [2].

**Definition A.1.** Let  $\mathcal{C} \subseteq \mathbb{R}^d$  be a convex cone. The statistical dimension of  $\mathcal{C}$  is defined as  $\delta(\mathcal{C}) = \mathbf{E}[\|\Pi_{\mathcal{C}}g\|_2^2]$ , where  $\Pi_{\mathcal{C}}$  denotes the Euclidean projection onto  $\mathcal{C}$  and the entries of  $g$  are i.i.d.  $N(0, 1)$ .

**Theorem A.1.** [2] Let  $f : \mathbb{R}^d \rightarrow \mathbb{R} \cup \{-\infty, +\infty\}$  be a proper convex function. Suppose that  $A \in \mathbb{R}^{n \times d}$  has i.i.d.  $N(0, 1)$  entries, and let  $z_0 = Ax_0$  for a fixed  $x_0 \in \mathbb{R}^d$ . Consider the convex optimization problem

$$\text{minimize } f(x) \quad \text{subject to } Ax = z_0. \quad (19)$$

and let  $\mathcal{D}(f, x_0) = \bigcup_{t>0} \{v \in \mathbb{R}^d : f(x_0 + tv) \leq f(x_0)\}$  denote the descent cone of  $f$  at  $x_0$ . Then, for any  $\varepsilon > 0$ , if  $n \leq (1 - \varepsilon)\delta(\mathcal{D}(f, x_0))$ , with probability at least  $1 - 32 \exp(-\varepsilon^2 \delta_m)$ ,  $x_0$  fails to be the unique solution of (19).

*Proof.* (Proposition 1). Define the symmetric vectorization map  $\text{svec} : \mathbb{S}^m \rightarrow \mathbb{R}^{\delta_m}$  by

$$\Sigma = (\sigma_{jk}) \mapsto (\sigma_{11}, \sqrt{2}\sigma_{12}, \dots, \sqrt{2}\sigma_{1m}, \sigma_{22}, \sqrt{2}\sigma_{23}, \dots, \sqrt{2}\sigma_{(m-1)m}, \sigma_{mm})^\top, \quad (20)$$

which is an isometry with respect to the Euclidean inner product on  $\mathbb{S}^m$  and  $\mathbb{R}^{\delta_m}$ , and by  $\text{svec}^{-1} : \mathbb{R}^{\delta_m} \rightarrow \mathbb{S}^m$  its inverse. We can then apply Theorem A.1 to the setting of Proposition 1 by using

$$d = \delta_m, \quad x = \text{svec}(\Sigma), \quad x_0 = 0, \quad f(x) = \iota_{\mathbb{S}_+^m}(\text{svec}^{-1}(x)), \quad A = \begin{bmatrix} \text{svec}(X_1) \\ \vdots \\ \text{svec}(X_n) \end{bmatrix},$$

where  $\iota_{\mathbb{S}_+^m}$  is the convex indicator function of  $\mathbb{S}_+^m$  which takes the value 0 if its argument is contained in  $\mathbb{S}_+^m$  and  $+\infty$  otherwise. Observe that  $\mathcal{D}(f, 0) = \mathbb{S}_+^m$ . It is shown in [2], Proposition 3.2, that the statistical dimension  $\delta(\mathbb{S}_+^m) = \delta_m/2$ . This concludes the proof.  $\square$

## B Proof of Proposition 2

Proposition 2 follows from the dual problem of the convex optimization problem associated with  $\tau^2(\mathcal{X}, R)$ . Below, it will be shown that the Lagrangian dual of the optimization problem

$$\begin{aligned} \min_{A, B} \frac{1}{n^{1/2}} \|\mathcal{X}(A) - \mathcal{X}(B)\|_2 \\ \text{subject to } A \succeq 0, B \succeq 0, \text{tr}(A) = R, \text{tr}(B) = 1. \end{aligned} \quad (21)$$

is given by

$$\begin{aligned} \max_{\theta, \delta, a} \theta \cdot R - \delta \\ \text{subject to } \frac{\mathcal{X}^*(a)}{\sqrt{n}} \succeq \theta I, \quad \frac{\mathcal{X}^*(a)}{\sqrt{n}} \preceq \delta I, \quad \|a\|_2 \leq 1. \end{aligned} \quad (22)$$

The assertion of Proposition 2 follows immediately from (22) by identifying  $\theta = \lambda_{\min}(n^{-1/2}\mathcal{X}^*(a))$  and  $\delta = \lambda_{\max}(n^{-1/2}\mathcal{X}^*(a))$ . In the remainder of the proof, duality of (21) and (22) is established. Using the shortcut  $\tilde{\mathcal{X}} = \mathcal{X}/\sqrt{n}$ , the Lagrangian of the dual problem (22) is given by

$$L(\theta, \delta, a; A, B, \kappa) = \theta \cdot R - \delta + \langle \tilde{\mathcal{X}}^*(a) - \theta I, A \rangle - \langle \tilde{\mathcal{X}}^*(a) - \delta I, B \rangle - \kappa(\|a\|_2^2 - 1).$$

Taking derivatives w.r.t.  $\theta, \delta, a$  and the setting the result equal to zero, we obtain from the KKT conditions that a primal-dual optimal pair  $(\hat{\theta}, \hat{\delta}, \hat{a}, \hat{A}, \hat{B}, \hat{\kappa})$  obeys

$$\text{tr}(\hat{A}) = R, \quad \text{tr}(\hat{B}) = 1, \quad \tilde{\mathcal{X}}(\hat{A}) - \tilde{\mathcal{X}}(\hat{B}) - \hat{\kappa}2\hat{a} = 0. \quad (23)$$

Taking the inner product of the rightmost equation with  $\widehat{a}$ , we obtain

$$\begin{aligned} & \langle \widehat{a}, \widetilde{\mathcal{X}}(\widehat{A}) - \widetilde{\mathcal{X}}(\widehat{B}) \rangle - \widehat{\kappa} 2 \|\widehat{a}\|_2^2 = 0. \\ \Leftrightarrow & \langle \widetilde{\mathcal{X}}^*(\widehat{a}), \widehat{A} - \widehat{B} \rangle - \widehat{\kappa} 2 \|\widehat{a}\|_2^2 = 0. \\ \Leftrightarrow & \widehat{\theta} \operatorname{tr}(\widehat{A}) - \widehat{\delta} \operatorname{tr}(\widehat{B}) - \widehat{\kappa} 2 \|\widehat{a}\|_2^2 = 0. \\ \Leftrightarrow & \widehat{\theta} R - \widehat{\delta} = \widehat{\kappa} 2 \|\widehat{a}\|_2^2, \end{aligned}$$

where the second equivalence is by complementary slackness. Consider first the case  $\widehat{\theta} R - \widehat{\delta} > 0$ . This entails  $\widehat{\kappa} > 0$  and thus  $\|\widehat{a}\|_2^2 = 1$ , so that  $2\widehat{\kappa} = \widehat{\theta} R - \widehat{\delta}$ . Substituting this result into the rightmost equation in (23) and taking norms, we obtain

$$\widehat{\theta} R - \widehat{\delta} = \|\widetilde{\mathcal{X}}(\widehat{A}) - \widetilde{\mathcal{X}}(\widehat{B})\|_2 = \frac{1}{\sqrt{n}} \|\mathcal{X}(\widehat{A}) - \mathcal{X}(\widehat{B})\|_2. \quad (24)$$

For the second case, note that  $\widehat{\theta} R - \widehat{\delta}$  cannot be negative as  $a = 0$  is feasible for (22). Thus,  $\widehat{\theta} R - \widehat{\delta} = 0$  implies that  $\widehat{a} = 0$  and in turn also (24).

## C Proof of Corollary 1

The corollary follows from Proposition 2 by choosing  $a = 1/\sqrt{n}$  so that  $n^{-1/2}\mathcal{X}^*(a) = \frac{1}{n} \sum_{i=1}^n X_i$ , and using that  $\|\Gamma - \widehat{\Gamma}_n\|_\infty \leq \epsilon_n$  implies that  $|\lambda_j(\Gamma) - \lambda_j(\widehat{\Gamma}_n)| \leq \epsilon_n$ ,  $j = 1, \dots, m$  ([12], §4.3). The specific values of  $R_*$  and  $\tau_*^2$  are obtained by choosing  $\zeta = 2$  in Proposition 2.

## D Proof of Theorem 1

The following lemma is a crucial ingredient in the proof. In the sequel, let  $\widehat{\Delta} = \widehat{\Sigma} - \Sigma^*$ . Let the eigendecomposition of  $\widehat{\Delta}$  be given by

$$\widehat{\Delta} = \sum_{j=1}^m \lambda_j(\widehat{\Delta}) u_j u_j^\top = \underbrace{\sum_{j=1}^m \max\{0, \lambda_j(\widehat{\Delta})\} u_j u_j^\top}_{=:\widehat{\Delta}^+} + \underbrace{\sum_{j=1}^m \min\{0, \lambda_j(\widehat{\Delta})\} u_j u_j^\top}_{=:\widehat{\Delta}^-} \quad (25)$$

**Lemma D.1.** *Consider the decomposition (25). We have  $\|\widehat{\Delta}^-\|_1 \leq \|\Sigma^*\|_1$ .*

*Proof.* Write  $\widehat{\Delta}^+ = U_+ \Lambda_+ U_+^\top$  and  $\widehat{\Delta}^- = U_- \Lambda_- U_-^\top$  for the eigendecompositions of  $\widehat{\Delta}^+$  and  $\widehat{\Delta}^-$ , respectively. Since  $\widehat{\Sigma} \succeq 0$ , we must have  $\operatorname{tr}(\widehat{\Sigma} U_- U_-^\top) \geq 0$  and thus

$$\begin{aligned} 0 & \leq \operatorname{tr}(\widehat{\Sigma} U_- U_-^\top) = \operatorname{tr}(U_-^\top \widehat{\Sigma} U_-) \\ & = \operatorname{tr}(U_-^\top (\Sigma^* + \widehat{\Delta}) U_-) \\ & = \operatorname{tr}(U_-^\top (\Sigma^* + U_+ \Lambda_+ U_+^\top + U_- \Lambda_- U_-^\top) U_-) \\ & = \operatorname{tr}(\Sigma^* U_- U_-^\top) + \operatorname{tr}(\Lambda_-), \end{aligned}$$

where for the last identity, we have used that  $U_+^\top U_- = 0$ . It follows that

$$\|\widehat{\Delta}^-\|_1 = \|\Lambda_-\|_1 = -\operatorname{tr}(\Lambda_-) \leq \operatorname{tr}(\Sigma^* U_- U_-^\top) \leq \|\Sigma^*\|_1 \|U_- U_-^\top\|_\infty = \|\Sigma^*\|_1.$$

□

Equipped with Lemma D.1, we turn to the proof of Theorem 1.

*Proof.* (Theorem 1) By definition of  $\widehat{\Sigma}$ , we have  $\|y - \mathcal{X}(\widehat{\Sigma})\|_2^2 \leq \|y - \mathcal{X}(\Sigma^*)\|_2^2$ . Using (6) and the definition of  $\widehat{\Delta}$ , we obtain after re-arranging terms that

$$\begin{aligned} \frac{1}{n} \|\mathcal{X}(\widehat{\Delta})\|_2^2 &\leq \frac{2}{n} \langle \varepsilon, \mathcal{X}(\widehat{\Delta}) \rangle = \frac{2}{n} \langle \mathcal{X}^*(\varepsilon), \widehat{\Delta} \rangle \\ \Rightarrow \frac{1}{n} \|\mathcal{X}(\widehat{\Delta})\|_2^2 &\leq 2 \|\mathcal{X}^*(\varepsilon)/n\|_\infty \|\widehat{\Delta}\|_1 = 2\lambda_0 (\|\widehat{\Delta}^+\|_1 + \|\widehat{\Delta}^-\|_1), \end{aligned} \quad (26)$$

where we have used Hölder's inequality, the decomposition of  $\widehat{\Delta}$  as in Lemma D.1 and  $\lambda_0 = \|\mathcal{X}^*(\varepsilon)/n\|_\infty$ . We now upper bound the l.h.s. of (26) by invoking Condition 1 and Lemma D.1, which yields  $\|\widehat{\Delta}^-\|_1 \leq \|\Sigma^*\|_1$ . If  $\|\widehat{\Delta}^+\|_1 \leq R_* \|\widehat{\Delta}^-\|_1$ , we have

$$\frac{1}{n} \|\mathcal{X}(\widehat{\Sigma}) - \mathcal{X}(\Sigma^*)\|_2^2 = \frac{1}{n} \|\mathcal{X}(\widehat{\Delta})\|_2^2 \leq 2(R_* + 1)\lambda_0 \|\Sigma^*\|_1,$$

which is the first part in the maximum of the bound to be established. In the opposite case, suppose first that  $\|\widehat{\Delta}^-\|_1 > 0$  (the case  $\|\widehat{\Delta}^-\|_1 = 0$  is discussed at the end of this proof) and we have  $\|\widehat{\Delta}^+\|_1 / \|\widehat{\Delta}^-\|_1 = \widehat{R} > R_* > 1$ . Consequently,

$$\begin{aligned} \frac{1}{n} \|\mathcal{X}(\widehat{\Delta})\|_2^2 &= \frac{1}{n} \|\mathcal{X}(\widehat{\Delta}^+) - \mathcal{X}(-\widehat{\Delta}^-)\|_2^2 \\ &= \|\widehat{\Delta}^-\|_1^2 \frac{1}{n} \left\| \mathcal{X} \left( \frac{\widehat{\Delta}^+}{\|\widehat{\Delta}^-\|_1} \right) - \mathcal{X} \left( \frac{-\widehat{\Delta}^-}{\|\widehat{\Delta}^-\|_1} \right) \right\|_2^2 \\ &\geq \|\widehat{\Delta}^-\|_1^2 \min_{\substack{A \in \widehat{R}\mathcal{S}_1^+(m) \\ B \in \mathcal{S}_1^+(m)}} \frac{1}{n} \|\mathcal{X}(A) - \mathcal{X}(B)\|_2^2 \\ &= \tau^2(\mathcal{X}, \widehat{R}) \|\widehat{\Delta}^-\|_1^2 = \tau^2(\mathcal{X}, \widehat{R}) \frac{\|\widehat{\Delta}^+\|_1^2}{\widehat{R}^2} \end{aligned}$$

Inserting this into (26), we obtain the following upper bound on  $\|\widehat{\Delta}^+\|_1$ .

$$\begin{aligned} \frac{\tau^2(\mathcal{X}, \widehat{R})}{\widehat{R}^2} \|\widehat{\Delta}^+\|_1^2 &\leq 2\lambda_0 \frac{\widehat{R} + 1}{\widehat{R}} \|\widehat{\Delta}^+\|_1 \\ \Rightarrow \|\widehat{\Delta}^+\|_1 &\leq 2\lambda_0 \frac{\widehat{R}(\widehat{R} + 1)}{\tau^2(\mathcal{X}, \widehat{R})} \leq 4\lambda_0 \frac{\widehat{R}^2}{\tau^2(\mathcal{X}, \widehat{R})} \leq 4\lambda_0 \frac{R_*^2}{\tau_*^2}, \end{aligned}$$

where the last inequality follows from the observation that for any  $R \geq R_*$

$$\tau^2(\mathcal{X}, R) \geq (R/R_*)^2 \tau^2(\mathcal{X}, R_*),$$

which can be easily seen from the dual problem (22) associated with  $\tau^2(\mathcal{X}, R)$ . Substituting the above bound on  $\|\widehat{\Delta}^+\|_1$  into (26) and using the bound  $\|\widehat{\Delta}^-\|_1 \leq \|\Sigma^*\|_1$  yields the second part in the maximum of the desired bound. To finish the proof, we still need to address the case  $\|\widehat{\Delta}^-\|_1 = 0$ . Recalling the definition of the quantity  $\tau_0^2(\mathcal{X})$  in (13), we bound

$$\frac{1}{n} \|\widehat{X}(\widehat{\Delta})\|_2^2 = \frac{1}{n} \|\widehat{X}(\widehat{\Delta}^+)\|_2^2 \geq \tau_0^2(\mathcal{X}) \|\widehat{\Delta}^+\|_1^2.$$

Inserting this into (26), we obtain from

$$\|\widehat{\Delta}^+\|_1 \leq \frac{2\lambda_0}{\tau_0^2(\mathcal{X})} \leq \frac{2\lambda_0(R_* - 1)^2}{\tau_*^2}, \quad (27)$$

where the second inequality follows from

$$\begin{aligned} \tau^2(\mathcal{X}, R_*) &= \min_{A \in R_*\mathcal{S}_1^+(m) B \in \mathcal{S}_1^+(m)} \frac{1}{n} \|\mathcal{X}(A) - \mathcal{X}(B)\|_2^2 \\ &\leq \min_{A \in \mathcal{S}_1^+(m)} \frac{1}{n} \|\mathcal{X}(R_* \cdot A) - \mathcal{X}(A)\|_2^2 \\ &= (R_* - 1)^2 \min_{A \in \mathcal{S}_1^+(m)} \frac{1}{n} \|\mathcal{X}(A)\|_2^2 = (R_* - 1)^2 \tau_0^2(\mathcal{X}) \end{aligned} \quad (28)$$

Back-substitution of (27) into (26) yields a bound that is implied by that of Theorem 1. This concludes the proof.  $\square$

*Bound on  $\lambda_0$ .* The bound on  $\lambda_0$  is an application of Theorem 4.6.1 in [25].

**Theorem D.1.** [25] Consider a sequence  $\{X_i\}_{i=1}^n$  of fixed matrices in  $\mathbb{S}^m$  and let  $\{\varepsilon_i\}_{i=1}^n \stackrel{i.i.d.}{\sim} N(0, \sigma^2)$ . Then for all  $t \geq 0$

$$\mathbf{P} \left( \left\| \sum_{i=1}^n \varepsilon_i X_i \right\|_{\infty} \geq t \right) \leq 2m \exp(-t^2/(2\sigma^2 V^2)), \quad V^2 := \left\| \sum_{i=1}^n X_i^2 \right\|_{\infty}.$$

Choosing  $t = \sigma V \sqrt{(1 + \mu) 2 \log(2m)}$  yields the desired bound.

## E Proof of Theorem 1, Remark 3

The bound hinges on the following concentration result for the extreme eigenvalues of the sample covariance of a Gaussian sample.

**Theorem E.1.** [9] Let  $z_1, \dots, z_N$  be an i.i.d. sample from  $N(0, I_m)$  and let  $\Gamma_N = \frac{1}{N} \sum_{i=1}^N z_i z_i^{\top}$ . We then have for any  $\delta > 0$

$$\mathbf{P} \left( \lambda_{\max} \left( \frac{1}{N} \Gamma_N \right) > \left( 1 + \delta + \sqrt{\frac{m}{N}} \right)^2 \right) \leq \exp(-N\delta^2/2).$$

In the proof, we also make use of the following fact.

**Lemma E.1.** Let  $\{X_i\}_{i=1}^n \subset \mathbb{S}_+^m$ . Then

$$\left\| \sum_{i=1}^n X_i^2 \right\|_{\infty} \leq \max_{1 \leq i \leq n} \|X_i\|_{\infty} \left\| \sum_{i=1}^n X_i \right\|_{\infty}.$$

*Proof.* First note that for any  $v \in \mathbb{R}^m$  and any  $M \in \mathbb{S}_+^m$ , we have that

$$v^{\top} M^2 v = \sum_{j=1}^m \lambda_j^2(M) (u_j^{\top} v)^2 \leq \lambda_{\max}(M) \sum_{j=1}^m \lambda_j(M) (u_j^{\top} v)^2 = \|M\|_{\infty} v^{\top} X v,$$

where  $\{u_j\}_{j=1}^m$  are the eigenvectors of  $X$ . Accordingly, we have

$$\begin{aligned} \left\| \sum_{i=1}^n X_i^2 \right\|_{\infty} &= \max_{\|v\|_2=1} v^{\top} \sum_{i=1}^n X_i^2 v \leq \max_{1 \leq i \leq n} \|X_i\|_{\infty} \max_{\|v\|_2=1} v^{\top} \sum_{i=1}^n X_i v \\ &= \max_{1 \leq i \leq n} \|X_i\|_{\infty} \left\| \sum_{i=1}^n X_i \right\|_{\infty}. \end{aligned}$$

$\square$

We now establish the bound to be shown. Each measurement matrix can be expanded as

$$X_i = \frac{1}{q} \sum_{k=1}^q z_{ik} z_{ik}^{\top}, \quad \{z_{ik}\}_{k=1}^q \stackrel{i.i.d.}{\sim} N(0, I_m), \quad i = 1, \dots, n.$$

Accordingly, we have

$$\begin{aligned} \left\| \frac{1}{n} \sum_{i=1}^n X_i^2 \right\|_{\infty} &= \left\| \frac{1}{n} \sum_{i=1}^n \left\{ \frac{1}{q} \sum_{k=1}^q z_{ik} z_{ik}^{\top} \right\}^2 \right\|_{\infty} \\ &\leq \max_{1 \leq i \leq n} \left\{ \left\| \frac{1}{q} \sum_{k=1}^q z_{ik} z_{ik}^{\top} \right\|_{\infty} \right\} \left\| \frac{1}{nq} \sum_{i=1}^n \sum_{k=1}^q z_{ik} z_{ik}^{\top} \right\|_{\infty} \\ &\leq \max_{1 \leq i \leq n} \left\{ \lambda_{\max} \left( \frac{1}{q} \sum_{k=1}^q z_{ik} z_{ik}^{\top} \right) \right\} \lambda_{\max}(\Gamma_{nq}) \end{aligned}$$

where  $\Gamma_{nq}$  follows the distribution of  $\Gamma_N$  in Theorem E.1 with  $N = nq$ . For the first term, applying Theorem E.1 with  $N = q$  and  $\delta = \sqrt{4m \log(n)/q}$  and using the union bound, we obtain that

$$\mathbf{P} \left( \lambda_{\max} \left( \frac{1}{q} \sum_{k=1}^q z_{ik} z_{ik}^\top \right) > \left( \frac{\sqrt{q} + \sqrt{m} + \sqrt{4m \log n}}{\sqrt{q}} \right)^2 \right) \leq \exp(-(2m-1) \log n).$$

Applying Theorem E.1 to  $\Gamma_N$  with  $\delta = 1/\sqrt{q}$ , we obtain that

$$\mathbf{P} \left( \lambda_{\max}(\Gamma_{nq}) > \left( 1 + \frac{1}{\sqrt{q}} + \sqrt{\frac{m}{nq}} \right)^2 \right) \leq \exp(-n/2).$$

Combining the two previous bounds yields the assertion.

## F Proof of Proposition 3

In the sequel, we write  $\Pi_{\mathbb{T}}$  and  $\Pi_{\mathbb{T}^\perp}$  for the orthogonal projections on  $\mathbb{T}$  and  $\mathbb{T}^\perp$ , respectively. Note first that since the  $\{\varepsilon_i\}_{i=1}^n$  are zero, any minimizer  $\widehat{\Sigma}$  satisfies

$$\mathcal{X}(\widehat{\Sigma}) = \mathcal{X}(\Sigma^*) \iff \mathcal{X}(\widehat{\Delta}) = 0 \iff \mathcal{X}(\widehat{\Delta}_{\mathbb{T}}) + \mathcal{X}(\widehat{\Delta}_{\mathbb{T}^\perp}) = 0 \quad (29)$$

where  $\widehat{\Delta}_{\mathbb{T}} = \Pi_{\mathbb{T}} \widehat{\Delta}$  and  $\widehat{\Delta}_{\mathbb{T}^\perp} = \Pi_{\mathbb{T}^\perp} \widehat{\Delta}$ , where we recall that  $\widehat{\Delta} = \widehat{\Sigma} - \Sigma^*$ . Note that since  $\Sigma^* = \Pi_{\mathbb{T}} \Sigma^*$ , for  $\widehat{\Sigma}$  to be feasible, it is necessary that  $\widehat{\Delta}_{\mathbb{T}^\perp} \succeq 0$ .

Suppose first that  $\tau^2(\mathbb{T}) = 0$ . Then there exist  $\Theta \in \mathbb{T}$  and  $\Lambda \in \mathcal{S}_1^+(m) \cap \mathbb{T}^\perp$  such that  $\mathcal{X}(\Theta) + \mathcal{X}(\Lambda) = 0$ . Hence, for any  $\Sigma^* \in \mathbb{T}$  with  $\Sigma^* + \Theta \succeq 0$ , the choices  $\widehat{\Delta}_{\mathbb{T}} = \Theta$  and  $\widehat{\Delta}_{\mathbb{T}^\perp} = \Lambda$  ensure that  $\widehat{\Sigma}$  is feasible and that (29) is satisfied. Since  $\Lambda$  is contained in the Schatten 1-norm sphere of radius 1, it is necessarily non-zero and thus  $\widehat{\Sigma} \neq \Sigma^*$ .

If  $\phi^2(\mathbb{T}) = 0$ , there exists  $0 \neq \Theta \in \mathbb{T}$  such that  $\mathcal{X}(\Theta) = 0$ . Consequently, for any  $\Sigma^* \in \mathbb{T} \cap \mathbb{S}_{\mathbb{T}}^m$  with  $\widehat{\Sigma} = \Sigma^* + \Theta \succeq 0$ , (29) is satisfied with  $\widehat{\Sigma} \neq \Sigma^*$ .

Conversely, if  $\tau^2(\mathbb{T}) > 0$ , (29) cannot be satisfied for  $\widehat{\Delta}_{\mathbb{T}^\perp} \succeq 0$ ,  $\widehat{\Delta}_{\mathbb{T}^\perp} \neq 0$ . Otherwise, we could divide by  $\text{tr}(\widehat{\Delta}_{\mathbb{T}^\perp})$ , which would yield

$$\underbrace{\mathcal{X}(\widehat{\Delta}_{\mathbb{T}} / \text{tr}(\widehat{\Delta}_{\mathbb{T}^\perp}))}_{\in \mathbb{T}} + \underbrace{\mathcal{X}(\widehat{\Delta}_{\mathbb{T}^\perp} / \text{tr}(\widehat{\Delta}_{\mathbb{T}^\perp}))}_{\in \mathcal{S}_1^+(m) \cap \mathbb{T}^\perp} = 0,$$

which would imply  $\tau^2(\mathbb{T}) = 0$ . Therefore, we must have  $\widehat{\Delta}_{\mathbb{T}^\perp} = 0$  and  $\mathcal{X}(\widehat{\Delta}_{\mathbb{T}}) = 0$ , which implies  $\widehat{\Delta}_{\mathbb{T}} = 0$  as long as  $\phi^2(\mathbb{T}) > 0$ .

## G Proof of Theorem 2

Let  $\widehat{\Delta} = \widehat{\Sigma} - \Sigma^*$ ,  $\widehat{\Delta}_{\mathbb{T}} = \Pi_{\mathbb{T}} \widehat{\Delta}$  and  $\widehat{\Delta}_{\mathbb{T}^\perp} = \Pi_{\mathbb{T}^\perp} \widehat{\Delta} \succeq 0$  as in the preceding proof. We start with the following analog to (26)

$$\frac{1}{n} \|\mathcal{X}(\widehat{\Delta})\|_2^2 = \frac{1}{n} \|\mathcal{X}(\widehat{\Delta}_{\mathbb{T}} + \widehat{\Delta}_{\mathbb{T}^\perp})\|_2^2 \leq 2\lambda_0 (\|\widehat{\Delta}_{\mathbb{T}}\|_1 + \|\widehat{\Delta}_{\mathbb{T}^\perp}\|_1) \quad (30)$$

Suppose that  $\widehat{\Delta}_{\mathbb{T}^\perp} \neq 0$ . We then have

$$\|\widehat{\Delta}_{\mathbb{T}^\perp}\|_1^2 \left\{ \frac{1}{n} \left\| \mathcal{X} \left( \frac{\widehat{\Delta}_{\mathbb{T}}}{\|\widehat{\Delta}_{\mathbb{T}^\perp}\|_1} \right) + \mathcal{X} \left( \frac{\widehat{\Delta}_{\mathbb{T}^\perp}}{\|\widehat{\Delta}_{\mathbb{T}^\perp}\|_1} \right) \right\|_2^2 \right\} \leq 2\lambda_0 (\|\widehat{\Delta}_{\mathbb{T}}\|_1 + \|\widehat{\Delta}_{\mathbb{T}^\perp}\|_1)$$

Since  $\widehat{\Delta}_{\mathbb{T}} / \|\widehat{\Delta}_{\mathbb{T}^\perp}\|_1 \in \mathbb{T}$  and  $\widehat{\Delta}_{\mathbb{T}^\perp} / \|\widehat{\Delta}_{\mathbb{T}^\perp}\|_1 = \widehat{\Delta}_{\mathbb{T}^\perp} / \text{tr}(\widehat{\Delta}_{\mathbb{T}^\perp}) \in \mathcal{S}_1^+(m)$ , we obtain that the term inside the curly brackets is lower bounded by  $\tau^2(\mathbb{T})$  and thus

$$\|\widehat{\Delta}_{\mathbb{T}^\perp}\|_1 \leq \frac{2\lambda_0}{\tau^2(\mathbb{T})} \left( 1 + \frac{\|\widehat{\Delta}_{\mathbb{T}}\|_1}{\|\widehat{\Delta}_{\mathbb{T}^\perp}\|_1} \right) \quad (31)$$

On the other hand, expanding the quadratic term in (30), we obtain that

$$\begin{aligned}
& \frac{1}{n} \|\mathcal{X}(\widehat{\Delta}_{\mathbb{T}})\|_2^2 - \frac{2}{n} \langle \mathcal{X}(\widehat{\Delta}_{\mathbb{T}}), \mathcal{X}(\widehat{\Delta}_{\mathbb{T}^\perp}) \rangle \leq \frac{1}{n} \|\mathcal{X}(\widehat{\Delta})\|_2^2 \leq 2\lambda_0(\|\widehat{\Delta}_{\mathbb{T}}\|_1 + \|\widehat{\Delta}_{\mathbb{T}^\perp}\|_1) \\
\Rightarrow & \frac{1}{n} \|\mathcal{X}(\widehat{\Delta}_{\mathbb{T}})\|_2^2 \leq 2\lambda_0(\|\widehat{\Delta}_{\mathbb{T}}\|_1 + \|\widehat{\Delta}_{\mathbb{T}^\perp}\|_1) + 2\mu(\mathbb{T})\|\widehat{\Delta}_{\mathbb{T}}\|_1\|\widehat{\Delta}_{\mathbb{T}^\perp}\|_1 \\
\Rightarrow & \phi^2(\mathbb{T})\|\widehat{\Delta}_{\mathbb{T}}\|_1^2 \leq 2\lambda_0(\|\widehat{\Delta}_{\mathbb{T}}\|_1 + \|\widehat{\Delta}_{\mathbb{T}^\perp}\|_1) + 2\mu(\mathbb{T})\|\widehat{\Delta}_{\mathbb{T}}\|_1\|\widehat{\Delta}_{\mathbb{T}^\perp}\|_1 \\
\Rightarrow & \|\widehat{\Delta}_{\mathbb{T}}\|_1 \leq \frac{2\lambda_0 \left(1 + \|\widehat{\Delta}_{\mathbb{T}^\perp}\|_1 / \|\widehat{\Delta}_{\mathbb{T}}\|_1\right) + 2\mu(\mathbb{T})\|\widehat{\Delta}_{\mathbb{T}^\perp}\|_1}{\phi^2(\mathbb{T})} \tag{32}
\end{aligned}$$

We now distinguish several cases.

**Case 1:**  $\|\widehat{\Delta}_{\mathbb{T}}\|_1 \leq \|\widehat{\Delta}_{\mathbb{T}^\perp}\|_1$ . It then immediately follows from (31) that

$$\|\widehat{\Delta}\|_1 \leq \frac{8\lambda_0}{\tau^2(\mathbb{T})} =: T_3. \tag{33}$$

**Case 2a:**  $\|\widehat{\Delta}_{\mathbb{T}}\|_1 > \|\widehat{\Delta}_{\mathbb{T}^\perp}\|_1$  and  $\|\widehat{\Delta}_{\mathbb{T}^\perp}\|_1 \leq 4\lambda_0/\phi^2(\mathbb{T})$ . From (32), we first get

$$\|\widehat{\Delta}_{\mathbb{T}}\|_1 \leq \frac{4\lambda_0 + 2\mu(\mathbb{T})\|\widehat{\Delta}_{\mathbb{T}^\perp}\|_1}{\phi^2(\mathbb{T})} \tag{34}$$

and thus

$$\|\widehat{\Delta}\|_1 \leq \frac{8\lambda_0}{\phi^2(\mathbb{T})} \left(1 + \frac{\mu(\mathbb{T})}{\phi^2(\mathbb{T})}\right) =: T_2 \tag{35}$$

**Case 2b:**  $\|\widehat{\Delta}_{\mathbb{T}}\|_1 > \|\widehat{\Delta}_{\mathbb{T}^\perp}\|_1$  and  $\|\widehat{\Delta}_{\mathbb{T}^\perp}\|_1 > 4\lambda_0/\phi^2(\mathbb{T})$ . Plugging (34) into (31), we obtain that

$$\|\widehat{\Delta}_{\mathbb{T}^\perp}\|_1 \leq \frac{4\lambda_0}{\tau^2(\mathbb{T})} + \frac{4\lambda_0\mu(\mathbb{T})}{\tau^2(\mathbb{T})\phi^2(\mathbb{T})}.$$

Substituting this bound back into (34) yields

$$\|\widehat{\Delta}_{\mathbb{T}}\|_1 \leq \frac{4\lambda_0}{\phi^2(\mathbb{T})} + \frac{8\lambda_0\mu(\mathbb{T})}{\tau^2(\mathbb{T})\phi^2(\mathbb{T})} + \frac{8\lambda_0\mu^2(\mathbb{T})}{\phi^4(\mathbb{T})\tau^2(\mathbb{T})}.$$

Collecting terms, we obtain altogether

$$\|\widehat{\Delta}\|_1 \leq 8\lambda_0 \frac{\mu(\mathbb{T})}{\tau^2(\mathbb{T})\phi^2(\mathbb{T})} \left(\frac{3}{2} + \frac{\mu(\mathbb{T})}{\phi^2(\mathbb{T})}\right) + 4\lambda_0 \left(\frac{1}{\phi^2(\mathbb{T})} + \frac{1}{\tau^2(\mathbb{T})}\right) =: T_1. \tag{36}$$

Combining (33), (35) and (36) yields the assertion.

## H Additional Experiments: Scaling of the Constant $\tau^2(\mathbb{T})$

For  $\mathcal{X}$  and  $\mathbb{T}$  given, it is possible to evaluate  $\tau^2(\mathbb{T})$  by solving a convex optimization problem. This is different from other conditions employed in the literature such as restricted strong convexity [17], 1-RIP [8] or restricted uniform boundedness [3] that involve a non-convex optimization problem even for fixed  $\mathbb{T}$ .

We here consider sampling operators with random i.i.d. measurements  $X_i = z_i z_i^\top$ , where  $z_i \sim N(0, I)$  is a standard Gaussian random vector in  $\mathbb{R}^m$  (equivalently,  $X_i$  follows a Wishart distribution),  $i = 1, \dots, n$ . We expect  $\tau^2(\mathbb{T})$  to behave similarly for random rank-one measurements of the same form as long as the underlying probability distribution has finite fourth moments, and thus for (a broad subclass of) the ensemble  $\mathcal{M}(\pi_m, q)$  (14).

In order to explore the scaling of  $\tau^2(\mathbb{T})$  with  $n$ ,  $m$  and  $r$ , we fix  $m \in \{30, 50, 70, 100\}$ . For each choice of  $m$ , we vary  $n = \alpha\delta_m$ , where a grid of 20 values ranging from 0.16 to 1.1 is considered  $\alpha$ . For  $r$ , we consider the grid  $\{1, 2, \dots, m/5\}$ . For each combination of  $m$ ,  $n$ , and  $r$ , we use 50 replications. Within each replication, the subspace  $\mathbb{T}$  is generated randomly from the eigenspace associated with the non-zero eigenvalues of a random matrix  $G^\top G$ , where the entries of the  $m \times r$  matrix  $G$  are i.i.d.  $N(0, 1)$ .



Figure 3: Scaling of  $\log \tau^2(\mathbb{T})$  in dependence of  $r$  (horizontal axis) and  $\alpha = n/\delta_m$  (colors/symbols). The solid lines represent the fit of model (37). Note that the curves are only fitted to those points for which  $\tau^2(\mathbb{T})$  exceeds  $10^{-6}$ . Best seen in color.

The results point to the existence of a phase transition as it is typical for problems related to that under study [2]. Specifically, it turns out that the scaling of  $\tau^2(\mathbb{T})$  can be well described by the relation

$$\tau^2(\mathbb{T}) \approx \phi_{m,n} \max\{1/r - \theta_{m,n}, 0\}, \quad (37)$$

where  $\phi_{m,n}, \theta_{m,n} > 0$  depend on  $m$  and  $n$ . In order to arrive at model (37), we first obtain the 5%-quantile as summary statistic of the 50 replications associated with each triple  $(n, m, r)$ . At this point, note that the use of the mean as a summary statistic is not appropriate as it may mask the fact that the majority of the observations are zero. For each pair of  $(n, m)$ , we then identify all values of  $r$  for which the corresponding 5%-quantile drops below  $10^{-6}$ , which serves as effective zero here. For the remaining values, we fit model (37) using nonlinear least squares (working on a log scale). Figure 3 shows that model (37) provides a rather accurate description of the given data. Concerning  $\phi_{m,n}$  and  $\theta_{m,n}$ , the scalings  $\phi_{m,n} = \phi_0 n/m$  and  $\theta_{m,n} = \theta_0 m/n$  for constants  $\phi_0, \theta_0 > 0$  appear to be reasonable. This gives rise to the requirement  $n > \theta_0(mr)$  for exact recovery to be possible in the noiseless case (cf. Proposition 3) and yields that  $\tau^2(\mathbb{T}) = \Omega(1/r)$  as long as  $n = \Omega(mr)$ ,

# I Enlarged Figures and Additional Tables

## I.1 Enlarged version of Figure 1



Figure 4: Average estimation error (over 50 replications) in nuclear norm for fixed  $m = 50$  and certain choices of  $n$  and  $r$ . In the legend, “LS” is used as a shortcut for “least squares”. Chen et al. refers to (16). “#” indicates an oracular choice of the tuning parameter. “oracle” refers to the ideal error  $\sigma r \sqrt{m/n}$ . Best seen in color.

Enlarged version of Figure 2



Figure 5: Average reconstruction errors  $\log_{10}\|\hat{\Sigma} - \Sigma^*\|_F$  in dependence of  $n/(mr)$  and the parameter  $\beta$ . “oracle” refers to the best rank  $r$ -approximation  $\Sigma_r$ .

### Additional Tables

The tables below contain orders of the errors  $\|\hat{\Sigma} - \Sigma^*\|_F$  relative to the error of the best rank  $r$  approximation  $\|\Sigma_r - \Sigma^*\|_F$  for selected values of  $C = n/(mr)$ .

| CBCL                                                              |     |     |    |    |     | NASDAQ                                                            |       |     |       |       |
|-------------------------------------------------------------------|-----|-----|----|----|-----|-------------------------------------------------------------------|-------|-----|-------|-------|
| $\beta$                                                           | 1   | 1   | .4 | .4 | .08 | $\beta$                                                           | 1     | 1   | 1     | 1     |
| $C$                                                               | 2   | 6   | 4  | 6  | 10  | $C$                                                               | 1     | 2   | 3     | 6     |
| $\frac{\ \hat{\Sigma} - \Sigma^*\ _F}{\ \Sigma_r - \Sigma^*\ _F}$ | < 3 | < 2 | 4  | 3  | 5   | $\frac{\ \hat{\Sigma} - \Sigma^*\ _F}{\ \Sigma_r - \Sigma^*\ _F}$ | < 3.5 | < 2 | < 1.3 | < 1.1 |

Table 1: Average reconstruction errors relative to  $\Sigma_r$  for some selected values of  $\beta$  and  $C = n/(mr)$ .
